# Supplementary material for: Prevalence of depression and suicide ideation in Hong Kong doctors: a cross-sectional study
Source: PubMed Central journal article supplement (PMC8481547; doi:10.1038/s41598-021-98668-4), 2021-09-29
Supplement: 41598_2021_98668_MOESM1_ESM.pdf [file 41598_2021_98668_MOESM1_ESM.pdf]

# **Prevalence of depression and suicide ideation in Hong Kong doctors: a cross-sectional study**

## **Supplementary Information**

Authors: Amy Pui Pui Ng, Weng Yee Chin, Eric Yuk Fai Wan, Julie Chen, Chak Sing Lau

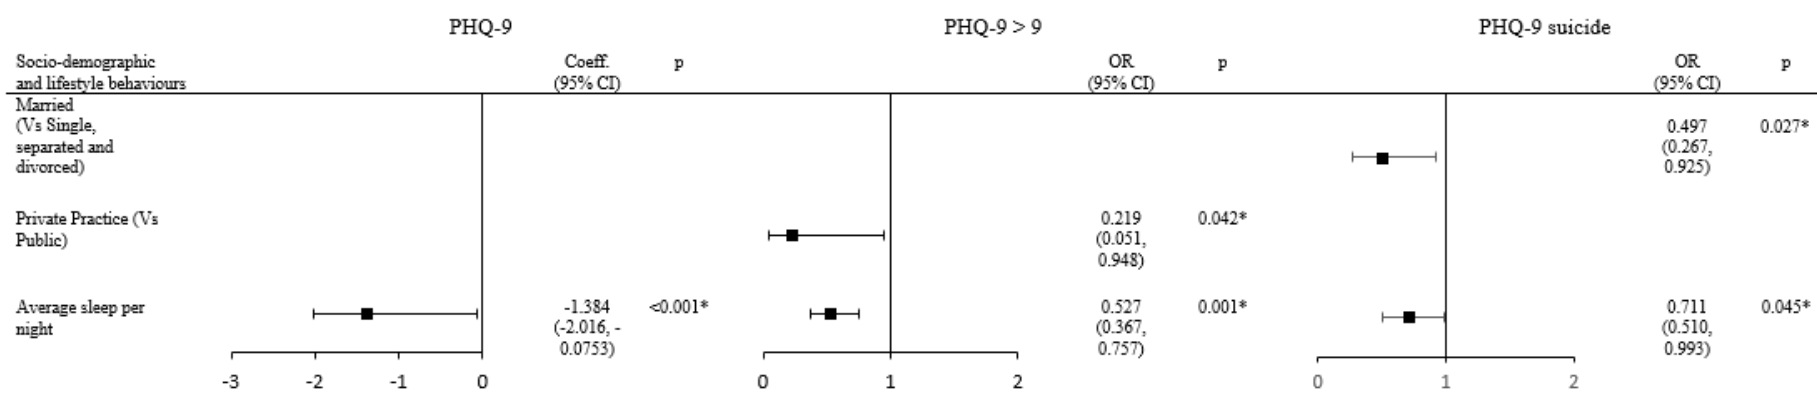

**Supplementary Fig. 1 Sociodemographic, professional satisfaction and lifestyle behaviours associated with PHQ-9 score by regression with forward stepwise selection for complete cases.**

PHQ-9, Patient Health Questionnaire-9, CI = Confidence Interval; Coeff = Coefficient; OR = Odds Ratio

\* Significant with p-value < 0.05

**Supplementary Table 1. Data completion rate for sociodemographic status, professional satisfaction, health status**

| <b>Total</b>                          | Doctors<br>(N =393) |
|---------------------------------------|---------------------|
| <b>Socio-demographic</b>              |                     |
| Age                                   | 100.0% (393)        |
| Gender                                | 100.0% (393)        |
| Marital Status                        | 99.7% (392)         |
| Having Children                       | 100.0% (393)        |
| Current specialty                     | 100.0% (393)        |
| Setting of practice                   | 100.0% (393)        |
| <b>Professional satisfaction</b>      |                     |
| Satisfied with present job position   | 99.7% (392)         |
| Satisfied with being a medical doctor | 100.0% (393)        |
| <b>Health status</b>                  |                     |
| Average sleep per night               | 99.2% (390)         |
| Hours of work per week                | 98.5% (387)         |
| Regular exercise                      | 100.0% (393)        |
| At-risk drinker                       | 89.8% (353)         |
| Current Smoker                        | 100.0% (393)        |
| Depression                            | 100.0% (393)        |
| PHQ-9 Suicide                         | 100.0% (393)        |
| PHQ-9 Total Score                     | 100.0% (393)        |

Notes:

PHQ = Patient Health Questionnaire

**Supplementary Table 2: Sociodemographic, professional satisfaction and lifestyle behaviours associated with PHQ-9 total score by regression analysis for complete cases.**

| Factor†                                                          | PHQ-9 score (N = 328) |                      |         |                            |                  |         |
|------------------------------------------------------------------|-----------------------|----------------------|---------|----------------------------|------------------|---------|
|                                                                  | Coeff.                | Univariate<br>95% CI | P-value | Forward stepwise selection |                  |         |
|                                                                  |                       |                      |         | Coeff.                     | 95% CI           | P-value |
| <b>Socio-demographic</b>                                         |                       |                      |         |                            |                  |         |
| Age                                                              | -0.093                | (-0.205, 0.020)      | 0.106   |                            |                  |         |
| Female (Vs Male)                                                 | 0.212                 | (-1.030, 1.454)      | 0.738   |                            |                  |         |
| Married (Vs Single, separated and divorced)                      | -1.440*               | (-2.668, -0.211)     | 0.022*  |                            | NA               |         |
| Having children (Vs No children)                                 | -1.441*               | (-2.745, -0.138)     | 0.030*  |                            |                  |         |
| Private setting of your Practice (Vs Public)                     | -1.562                | (-3.234, 0.109)      | 0.067   |                            |                  |         |
| Current specialty                                                |                       |                      |         |                            |                  |         |
| Anaesthesiology/ Emergency Medicine/ Intensive Care              | 1.924                 | (-0.435, 4.283)      | 0.110   |                            |                  |         |
| Clinical Oncology/ Dermatology and Venerology/ Internal Medicine | 0.639                 | (-1.415, 2.693)      | 0.541   |                            | NA               |         |
| Pathology/ Radiology                                             | 0.456                 | (-2.126, 3.037)      | 0.729   |                            |                  |         |
| Family Medicine/ General Practice/ Community Medicine            |                       | reference group      |         |                            |                  |         |
| Obstetrics & Gynaecology                                         | 1.318                 | (-1.448, 4.083)      | 0.349   |                            |                  |         |
| Orthopaedic Surgery/ Otorhinolaryngology/ Surgery/ Ophthalmology | 0.926                 | (-1.026, 2.878)      | 0.351   |                            |                  |         |
| Paediatrics                                                      | 1.539                 | (-1.319, 4.397)      | 0.290   |                            |                  |         |
| Psychiatry                                                       | 0.839                 | (-1.926, 3.604)      | 0.551   |                            |                  |         |
| <b>Professional satisfaction</b>                                 |                       |                      |         |                            |                  |         |
| Satisfied your present job position (Vs Not satisfied)           | -0.362                | (-1.904, 1.181)      | 0.645   |                            |                  |         |
| Satisfied with being a medical doctor (Vs Not satisfied)         | -2.000                | (-4.863, 0.863)      | 0.170   |                            | NA               |         |
| <b>Lifestyle behaviours</b>                                      |                       |                      |         |                            |                  |         |
| Average sleep per night                                          | -1.384*               | (-2.016, -0.753)     | <0.001* | -1.384*                    | (-2.016, -0.753) | <0.001* |
| Hours of work per week                                           | 0.045*                | (0.006, 0.085)       | 0.025*  |                            |                  |         |
| Current Smoker (VS non-smoker/ex-smoker)                         | 5.687                 | (-2.233, 13.608)     | 0.159   |                            |                  |         |
| Regular exercise (Vs no regular exercise)                        | -1.710*               | (-3.171, -0.249)     | 0.022*  |                            | NA               |         |
| At-risk drinker                                                  | 1.089                 | (-0.312, 2.490)      | 0.127   |                            |                  |         |

Notes:

CI = Confidence Interval; Coeff = Coefficient; NA = Not Applicable

Current Smoker (Current smoker vs Non-smoker/ex-smoker)

Regular exercise (5 or more days per week for at least 10 minutes per day / Any vigorous and moderate physical activities)

Private Practice (Private Solo/ Private Hospital/Non-government organisation)

Public Practice (University/Government/Hospital Authority/Not applicable)

At-risk drinkers were defined if the doctors had 3 or more in AUDIT-C score.

\* Significant with p-value < 0.05

† Variable in brackets is the reference category for independent variables

**Supplementary Table 3. Sociodemographic, professional satisfaction and lifestyle behaviours associated with PHQ-9 >9 by regression analysis for complete cases.**

| Factor†                                                             | PHQ-9 >9 (N = 328) |                      |         |                            |                |         |
|---------------------------------------------------------------------|--------------------|----------------------|---------|----------------------------|----------------|---------|
|                                                                     | OR                 | Univariate<br>95% CI | P-value | Forward stepwise selection |                |         |
|                                                                     |                    |                      |         | OR                         | 95% CI         | P-value |
| <b>Socio-demographic</b>                                            |                    |                      |         |                            |                |         |
| Age                                                                 | 0.954              | (0.902, 1.010)       | 0.105   |                            | NA             |         |
| Female (Vs Male)                                                    | 0.896              | (0.491, 1.637)       | 0.721   |                            |                |         |
| Married (Vs Single, separated and divorced)                         | 0.436*             | (0.234, 0.811)       | 0.009*  |                            |                |         |
| Having children (Vs No children)                                    | 0.502              | (0.247, 1.023)       | 0.058   |                            |                |         |
| Private setting of your Practice (Vs Public)                        | 0.181*             | (0.043, 0.768)       | 0.020*  | 0.219*                     | (0.051, 0.948) | 0.042*  |
| Current specialty                                                   |                    |                      |         |                            |                |         |
| Anaesthesiology/ Emergency Medicine/ Intensive Care                 | 2.839              | (0.917, 8.789)       | 0.070   |                            |                |         |
| Clinical Oncology/ Dermatology and Venerology/ Internal<br>Medicine | 1.333              | (0.433, 4.107)       | 0.616   |                            | NA             |         |
| Pathology/ Radiology                                                | 1.920              | (0.532, 6.933)       | 0.319   |                            |                |         |
| Family Medicine/ General Practice/ Community Medicine               |                    | reference group      |         |                            |                |         |
| Obstetrics & Gynaecology                                            | 1.325              | (0.302, 5.811)       | 0.709   |                            |                |         |
| Orthopaedic Surgery/ Otorhinolaryngology/ Surgery/                  | 1.338              | (0.457, 3.920)       |         |                            |                |         |
| Ophthalmology                                                       |                    |                      | 0.595   |                            |                |         |
| Paediatrics                                                         | 3.533              | (0.994, 12.563)      | 0.051   |                            |                |         |
| Psychiatry                                                          | 1.860              | (0.473, 7.314)       | 0.375   |                            |                |         |
| <b>Professional satisfaction</b>                                    |                    |                      |         |                            |                |         |
| Satisfied your present job position (Vs Not satisfied)              | 0.901              | (0.434, 1.869)       | 0.779   |                            |                |         |
| Satisfied with being a medical doctor (Vs Not satisfied)            | 0.788              | (0.216, 2.869)       | 0.718   |                            | NA             |         |
| <b>Lifestyle behaviours</b>                                         |                    |                      |         |                            |                |         |
| Average sleep per night                                             | 0.507*             | (0.356, 0.722)       | <0.001* | 0.527*                     | (0.367, 0.757) | 0.001*  |
| Hours of work per week                                              | 1.015              | (0.996, 1.035)       | 0.114   |                            |                |         |
| Current Smoker (VS non-smoker/ex-smoker)                            | 5.520              | (0.340, 89.703)      | 0.230   |                            |                |         |
| Regular exercise (Vs no regular exercise)                           | 0.592              | (0.307, 1.143)       | 0.118   |                            | NA             |         |
| At-risk drinker                                                     | 1.861              | (0.990, 3.497)       | 0.054   |                            |                |         |

Notes:

CI = Confidence Interval; Coeff = Coefficient; OR = Odds Ratio; NA = Not Applicable

Current Smoker (Current smoker vs Non-smoker/ex-smoker)

Regular exercise (5 or more days per week for at least 10 minutes per day / Any vigorous and moderate physical activities)

Private Practice (Private Solo/ Private Hospital/Non-government organisation)

Public Practice (University/Government/Hospital Authority/Not applicable)

At-risk drinkers were defined if the doctors had 3 or more in AUDIT-C score.

\* Significant with p-value < 0.05

† Variable in brackets is the reference category for independent variables

**Supplementary Table 4. Sociodemographic, professional satisfaction and lifestyle behaviours associated with PHQ-9 suicide score by regression analysis for complete cases.**

| Factor†                                                          | PHQ-9 suicide (N = 328) |                      |         |                            |                |         |
|------------------------------------------------------------------|-------------------------|----------------------|---------|----------------------------|----------------|---------|
|                                                                  | OR                      | Univariate<br>95% CI | P-value | Forward stepwise selection |                |         |
|                                                                  |                         |                      |         | OR                         | 95% CI         | P-value |
| <b>Socio-demographic</b>                                         |                         |                      |         |                            |                |         |
| Age                                                              | 0.976                   | (0.924 , 1.030)      | 0.374   |                            |                |         |
| Female (Vs Male)                                                 | 0.754                   | (0.414 , 1.372)      | 0.355   |                            | NA             |         |
| Married (Vs Single, separated and divorced)                      | 0.446*                  | (0.242 , 0.820)      | 0.009*  | 0.497*                     | (0.267, 0.925) | 0.027*  |
| Having children (Vs No children)                                 | 0.537                   | (0.270 , 1.070)      | 0.077   |                            |                |         |
| Private setting of your Practice (Vs Public)                     | 0.493                   | (0.186 , 1.302)      | 0.153   |                            | NA             |         |
| Current specialty                                                |                         |                      |         |                            |                |         |
| Anaesthesiology/ Emergency Medicine/ Intensive Care              | 2.388                   | (0.803 , 7.097)      | 0.117   |                            |                |         |
| Clinical Oncology/ Dermatology and Venerology/ Internal Medicine | 1.286                   | (0.445 , 3.711)      | 0.642   |                            | NA             |         |
| Pathology/ Radiology                                             | 0.891                   | (0.212 , 3.741)      | 0.875   |                            |                |         |
| Family Medicine/ General Practice/ Community Medicine            |                         | reference group      |         |                            |                |         |
| Obstetrics & Gynaecology                                         | 2.063                   | (0.581 , 7.323)      | 0.262   |                            |                |         |
| Orthopaedic Surgery/ Otorhinolaryngology/ Surgery/ Ophthalmology | 1.677                   | (0.630 , 4.466)      | 0.301   |                            |                |         |
| Paediatrics                                                      | 1.748                   | (0.455 , 6.709)      | 0.416   |                            |                |         |
| Psychiatry                                                       | 0.707                   | (0.136 , 3.688)      | 0.681   |                            |                |         |
| <b>Professional satisfaction</b>                                 |                         |                      |         |                            |                |         |
| Satisfied your present job position (Vs Not satisfied)           | 0.735                   | (0.367 , 1.470)      | 0.384   |                            |                |         |
| Satisfied with being a medical doctor (Vs Not satisfied)         | 0.400                   | (0.133 , 1.203)      | 0.103   |                            | NA             |         |
| <b>Lifestyle behaviours</b>                                      |                         |                      |         |                            |                |         |
| Average sleep per night                                          | 0.668*                  | (0.483 , 0.926)      | 0.015*  | 0.711*                     | (0.510, 0.993) | 0.045*  |
| Hours of work per week                                           | 1.015                   | (0.996 , 1.034)      | 0.114   |                            |                |         |
| Current Smoker (VS non-smoker/ex-smoker)                         | 5.269                   | (0.324 , 85.584)     | 0.243   |                            |                |         |
| Regular exercise (Vs no regular exercise)                        | 1.331                   | (0.634 , 2.796)      | 0.450   |                            | NA             |         |
| At-risk drinker                                                  | 1.410                   | (0.745 , 2.668)      | 0.291   |                            |                |         |

Notes:

CI = Confidence Interval; Coeff = Coefficient; OR = Odds Ratio; NA = Not Applicable

Current Smoker (Current smoker vs Non-smoker/ex-smoker)

Regular exercise (5 or more days per week for at least 10 minutes per day / Any vigorous and moderate physical activities)

Private Practice (Private Solo/ Private Hospital/Non-government organisation)

Public Practice (University/Government/Hospital Authority/Not applicable)

At-risk drinkers were defined if the doctors had 3 or more in AUDIT-C score.

\* Significant with p-value < 0.05

† Variable in brackets is the reference category for independent variables
